# Supplementary material
Source: publisher figshare collection journal article supplement (https://karger.figshare.com/articles/dataset/_/6945224)
Supplement: Supplementary file 1 [file 1]

**Part II: Dietary Habits**

In the following, we would like to learn how often you eat certain foods or drink certain beverages. Please answer by indicating how often you eat or drink each of the following items. To do so, put an X in the answer category (that is, from “never” to “always”) which most nearly holds true for you.

|                                                                            |                          |                          |                          |                          |                          |
|----------------------------------------------------------------------------|--------------------------|--------------------------|--------------------------|--------------------------|--------------------------|
| 1. How often do you eat the following foods between meals?                 |                          |                          |                          |                          |                          |
|                                                                            | never                    | seldom                   | occasion-<br>ally        | often                    | always                   |
| Apples                                                                     | <input type="checkbox"/> |
| Bananas                                                                    | <input type="checkbox"/> |
| Carrots                                                                    | <input type="checkbox"/> |
| Chocolate bars                                                             | <input type="checkbox"/> |
| Cake                                                                       | <input type="checkbox"/> |
| Granola bars                                                               | <input type="checkbox"/> |
| Fruit yogurt                                                               | <input type="checkbox"/> |
| OTHER (Please indicate): _____                                             |                          |                          |                          |                          |                          |
| 2. How often do you eat the following kinds of bread?                      |                          |                          |                          |                          |                          |
|                                                                            | never                    | seldom                   | occasion-<br>ally        | often                    | always                   |
| White bread                                                                | <input type="checkbox"/> |
| Brown bread                                                                | <input type="checkbox"/> |
| Whole-grain bread                                                          | <input type="checkbox"/> |
| Crispbread                                                                 | <input type="checkbox"/> |
| Sweet rolls                                                                | <input type="checkbox"/> |
| Flatbread                                                                  | <input type="checkbox"/> |
| Zwieback / Rusk                                                            | <input type="checkbox"/> |
| OTHER (Please indicate): _____                                             |                          |                          |                          |                          |                          |
| 3. How often do you imbibe the following beverages when you are traveling? |                          |                          |                          |                          |                          |
|                                                                            | never                    | seldom                   | occasion-<br>ally        | often                    | always                   |
| Mineral water                                                              | <input type="checkbox"/> |
| Fruit juice                                                                | <input type="checkbox"/> |
| Vegetable juice                                                            | <input type="checkbox"/> |
| Iced tea                                                                   | <input type="checkbox"/> |
| Juice and mineral water                                                    | <input type="checkbox"/> |
| Milk                                                                       | <input type="checkbox"/> |
| cocoadrink                                                                 | <input type="checkbox"/> |
| Coffee with sugar                                                          | <input type="checkbox"/> |
| Soda / cola                                                                | <input type="checkbox"/> |
| Unsweetened tea                                                            | <input type="checkbox"/> |
| OTHER (Please indicate): _____                                             |                          |                          |                          |                          |                          |

|                                                                                  |                          |                          |                          |                          |                          |
|----------------------------------------------------------------------------------|--------------------------|--------------------------|--------------------------|--------------------------|--------------------------|
| 4. How often do you eat the following foods at breakfast?                        |                          |                          |                          |                          |                          |
|                                                                                  | never                    | seldom                   | occasionally             | often                    | always                   |
| Cornflakes with milk                                                             | <input type="checkbox"/> |
| Muesli with fruit                                                                | <input type="checkbox"/> |
| Rolls and jam                                                                    | <input type="checkbox"/> |
| Bread with sausage                                                               | <input type="checkbox"/> |
| Bread with cheese                                                                | <input type="checkbox"/> |
| Cake                                                                             | <input type="checkbox"/> |
| Fruit yogurt                                                                     | <input type="checkbox"/> |
| Oat flakes with fruit                                                            | <input type="checkbox"/> |
| OTHER (Please indicate): _____                                                   |                          |                          |                          |                          |                          |
| 5. How often do you eat the following foods while watching television?           |                          |                          |                          |                          |                          |
|                                                                                  | never                    | seldom                   | occasionally             | often                    | always                   |
| Sweet popcorn                                                                    | <input type="checkbox"/> |
| Salted popcorn                                                                   | <input type="checkbox"/> |
| Chips                                                                            | <input type="checkbox"/> |
| Sour apple rings                                                                 | <input type="checkbox"/> |
| Chocolate                                                                        | <input type="checkbox"/> |
| Fruit                                                                            | <input type="checkbox"/> |
| Dried apricots / dates                                                           | <input type="checkbox"/> |
| Salted nuts                                                                      | <input type="checkbox"/> |
| Cookies                                                                          | <input type="checkbox"/> |
| Raw vegetables (cucumbers, carrots)                                              | <input type="checkbox"/> |
| OTHER (Please indicate): _____                                                   |                          |                          |                          |                          |                          |
| 6. How often do you eat the following foods when you get hungry while traveling? |                          |                          |                          |                          |                          |
|                                                                                  | never                    | seldom                   | occasionally             | often                    | always                   |
| Chocolate / chocolate bars                                                       | <input type="checkbox"/> |
| Cake                                                                             | <input type="checkbox"/> |
| Bratwurst /curried sausage with bread                                            | <input type="checkbox"/> |
| French fries with ketchup / mayonnaise                                           | <input type="checkbox"/> |
| Hamburgers                                                                       | <input type="checkbox"/> |
| Fruit                                                                            | <input type="checkbox"/> |
| Fruit yogurt                                                                     | <input type="checkbox"/> |
| Dry rolls                                                                        | <input type="checkbox"/> |
| Open sandwiches with lettuce                                                     | <input type="checkbox"/> |
| Kebab                                                                            | <input type="checkbox"/> |
| Cookies                                                                          | <input type="checkbox"/> |

OTHER (Please indicate): \_\_\_\_\_
